# Supplementary material for: A newly isolated Trichoderma Parareesei N4-3 exhibiting a biocontrol potential for banana fusarium wilt by Hyperparasitism
Source: Frontiers journal article supplement (doi:10.3389/fpls.2023.1289959), 2023-10-24
Supplement: Data_Sheet_1.ZIP [file Data_Sheet_1.ZIP]

## Sheet: Figure 6A
Chitinase standard curve	Absorbance
N-acetylglucosamine concentration (μg/mL)	OD585	OD585	OD585	Average	Measurement
0	0.043	0.042	0.045	0.0433333	0	0.0433333
1.25	0.051	0.051	0.054	0.052	0.00866667
2.5	0.065	0.062	0.069	0.0653333	0.022
5	0.084	0.082	0.077	0.081	0.0376667
10	0.112	0.114	0.115	0.113667	0.0703333
20	0.185	0.179	0.185	0.183	0.139667
40	0.324	0.324	0.326	0.324667	0.281333
80	0.585	0.585	0.569	0.579667	0.536333
100	0.633	0.634	0.644	0.637	0.593667
	Control OD			Measurement OD			△OD			Measurement				Chitinase activity (U/mL)
Ammonium sulfate saturation	OD585	OD585	OD585	OD585	OD585	OD585											Average	SD
10	0.304	0.302	0.303	0.289	0.284	0.291	0.015	0.018	0.012	1.0522	1.53322	0.57118		2.6305	3.83305	1.42795	2.6305	1.20255
20	0.344	0.343	0.333	0.296	0.306	0.303	0.048	0.037	0.03	6.34342	4.57968	3.4573		15.8585	11.4492	8.64325	11.9837	3.63722
30	0.293	0.297	0.297	0.196	0.206	0.2	0.097	0.091	0.097	14.2001	13.238	14.2001		35.5002	33.0951	35.5002	34.6985	1.38859
40	0.296	0.299	0.294	0.282	0.274	0.282	0.014	0.025	0.012	0.89186	2.6556	0.57118		2.22965	6.639	1.42795	3.4322	2.80595
50	0.287	0.289	0.291	0.278	0.277	0.274	0.009	0.012	0.017	0.09016	0.57118	1.37288		0.2254	1.42795	3.4322	1.69518	1.62002
60	0.278	0.276	0.277	0.267	0.264	0.268	0.011	0.012	0.009	0.41084	0.57118	0.09016		1.0271	1.42795	0.2254	0.893483	0.612308
70	0.268	0.271	0.267	0.257	0.261	0.257	0.011	0.01	0.01	0.41084	0.2505	0.2505		1.0271	0.62625	0.62625	0.759867	0.231431
80	0.265	0.264	0.263	0.249	0.251	0.249	0.016	0.013	0.014	1.21254	0.73152	0.89186		3.03135	1.8288	2.22965	2.36327	0.612308
90	0.271	0.276	0.274	0.259	0.263	0.259	0.012	0.013	0.015	0.57118	0.73152	1.0522		1.42795	1.8288	2.6305	1.96242	0.612308
Glucose concentration (mg/mL)	OD540
0	0
0.2
0.4
0.6	0.263334
0.8	0.327667
1	0.447667
1.2
1.4
1.6	0.731667
1.8	0.805
	Control OD			Measurement OD			△OD			Measurement			β- 1,3 -glucanase activity (U/mL)			Average	SD
β- 1,3-glucanase activity（U/mL）	OD540	OD540	OD540	OD540	OD540	OD540
10	0.436	0.421	0.426	0.47	0.474	0.491	0.034	0.053	0.065	0.171381	0.144984	0.10319	1.71381	1.44984	1.0319	0.343839	1.39851
20	0.45	0.46	0.454	0.558	0.556	0.557	0.108	0.096	0.103	0.254969	0.239571	0.265968	2.54969	2.39571	2.65968	0.132592	2.53503
30	0.264	0.26	0.257	0.599	0.592	0.611	0.335	0.332	0.354	0.807094	0.7587	0.7653	8.07094	7.587	7.653	0.262432	7.77031							μ
40	0.573	0.549	0.561	0.769	0.739	0.779	0.196	0.19	0.218	0.507935	0.446343	0.459541	5.07935	4.46343	4.59541	0.324285	4.71273
50	0.511	0.51	0.505	0.671	0.653	0.714	0.16	0.143	0.209	0.488137	0.342957	0.380352	4.88137	3.42957	3.80352	0.753805	4.03815
60	0.384	0.39	0.392	0.33	0.324	0.313	0.054	0.066	0.079	0.202176	0.17358	0.147184	2.02176	1.7358	1.47184	0.275036	1.74313
70	0.393	0.402	0.405	0.421	0.468	0.444	0.028	0.066	0.039	0.114188	0.17358	0.0899916	1.14188	1.7358	0.899916	0.430115	1.2592
80	0.508	0.501	0.507	0.548	0.542	0.501	0.04	0.041	-0.006	0.0152018	0.118588	0.116388	0.152018	1.18588	1.16388	0.590651	0.833925
90	0.17	0.171	0.172	0.193	0.195	0.182	0.023	0.024	0.01	0.050397	0.0811928	0.0789931	0.50397	0.811928	0.789931	0.171802	0.701943

## Sheet: Figure 6B
Concentration of crude enzyme solution (mg/mL)	Colony diameter (cm)	Colony diameter (cm)	Colony diameter (cm)	Inhibition rate (%)	Inhibition rate (%)	Inhibition rate (%)	Average	SD
0	5.4	5.5	5.6
25	5.2	5.2	5.4	0.037037	0.0545455	0.0357143	0.0424323	0.0105112
50	5	4.9	4.95	0.0740741	0.109091	0.116071	0.0997455	0.0225044
100	4.8	4.7	4.85	0.111111	0.145455	0.133929	0.130165	0.0174783
200	4.6	4.5	4.7	0.148148	0.181818	0.160714	0.16356	0.0170145
400	3.5	3.4	3.5	0.351852	0.381818	0.375	0.369557	0.0157072

## Sheet: Figure 6C
Control
Number of spores germinated	Number of spores not germinated	Spores germination rate (%)	Average	SD
108	13	89.2562	87.4876	2.15474
97	17	85.0877
89	12	88.1188
Treatment
Number of spores germinated	Number of spores not germinated	Spores germination rate (%)	Average	SD
13	110	10.5691	9.74009	0.829107
9	92	8.91089
15	139	9.74026
Germ tube length (μm)	Control	Treatment
	66.7	13.3
	60.1	13.35
	46.7	9.4
	56.2	17.3
	48.1	6.7
	60.3	17.2
	49.3	20.6
	130.7	14.4
	42.7	9.6
	76.2	9.3
	93.3	18.8
	66.7	8.3
	112.1	16.1
	73.3	20.2
	74.7	16.3
	73.3	12.1
	53.3	20
	53.4	20.6
	76.6	13.3
	46.7	9.5
Average	68.02	14.3175
SD	22.074	4.40015
