# Supplementary material for: A newly isolated Trichoderma Parareesei N4-3 exhibiting a biocontrol potential for banana fusarium wilt by Hyperparasitism
Source: Front Plant Sci. 2023 Oct 24;14:1289959. doi: 10.3389/fpls.2023.1289959 (PMC10629295; doi:10.3389/fpls.2023.1289959)
Supplement: Supplementary file 4 [file DataSheet_3.xlsx]

## Sheet: Sheet1
Supplementary table 1. Strains used in phylogenetic analyses and their corresponding GenBank accession numbers.
Species	Strain	GenBank accession numbers
		tef1	rbp2
Trichoderma parareesei	CP55_3	MW541129	MW541109
Trichoderma aquatica	YMF1.04625	MK775507	MK775512
Trichoderma aquatica	YMF1.04624	MK775506	MK775511
Trichoderma rugosum	11325	MH612379	MH612373
Trichoderma rugosum	11139	MH612378	MH612372
Trichoderma citrinoviride	TRS745	KP008894	KP009188
Trichoderma longibrachiatum	Tloum3	MT081437	MT118251
Trichoderma longibrachiatum	HL167	MZ241241	MZ241240
Trichoderma orientale	S187	JQ685868	JQ685884
Trichoderma longibrachiatum	TLS6	MT069951	MT069959
Trichoderma reesei	CBS999.97	CP020876.1	CP017984.1
Trichoderma reesei	QM6a	CP016234.1	CP016235.1
Trichoderma breve	T069	OP913377.1	OP913376.1
Trichoderma longibrachiatum	HL167	MZ241241.1	MZ241240.1
Trichoderma gamsii	TW20050	KU523895.1	KU523896.1
Trichoderma capillare	TW22166	KT862524.1	KT862525.1
Trichoderma istrianum	S310	KJ665523.1	KJ665281.1
Trichoderma attinorum	LESF236	KT279039.1	KT278971.1
Trichoderma viridialbum	S250	KC285706.1	KC285774.1
Trichoderma sempervirentis	S599	KC285755.1	KC285755.1
Trichoderma pholiotae	JZBQH12	ON649919.1	ON649972.1
Trichoderma istrianum	S123	KJ665521.1	KJ665280.1
Trichoderma confluens	9649	KT001959.1	KT001964.1
Trichoderma viridarium	S136	KC285658.1	KC285760.1
Verticillium alfalfae	VaMs.102	XM_003001642.1	XM_003000681.1
