# Supplementary material for: A newly isolated Trichoderma Parareesei N4-3 exhibiting a biocontrol potential for banana fusarium wilt by Hyperparasitism
Source: Front Plant Sci. 2023 Oct 24;14:1289959. doi: 10.3389/fpls.2023.1289959 (PMC10629295; doi:10.3389/fpls.2023.1289959)
Supplement: Supplementary file 5 [file DataSheet_4.xlsx]

## Sheet: SPAD
SPAD																															Average	SD
Blank	44.9	36.2	29.1	49.3	43.5	42.2	42.7	39.4	41.3	48.2	37.3	31.8	34.3	32.3	37.2	29	35	29.5	28.8	35.3	33	31.2	30.7	31.3	27.5	30.5	28.8	27.7	29.9	31.8	34.99	6.17373
Control	41.6	42.1	28.3	43.5	31.9	42.2	39.2	21.7	21.8	37.4	21.9	28.2	26.8	21.7	21.1	37.4	30.5	19.9	24.9	27.6	24.2	23.7	19.7	26.3	13.9	26.9	22.8	30.1	20.8	19.7	27.9267	7.92805
Treatment	59.8	55.6	56.2	54	58.9	53.3	56.3	51	55	51.6	59.6	57.6	60.6	53.7	52.4	55.6	50.8	54.4	56.7	53.5	53.2	52.8	44.6	48.7	40.4	42.5	40.5	49.1	48.3	52.4	52.6367	5.22465

## Sheet: Pseudostem diameter (mm)
Pseudostem diameter (mm)											Average	SD
Blank	15.175	16.41	16.815	16.925	15.185	13.905	14.955	16.395	14.965	16.425	15.7155	1.00622
Control	12.48	14.91	13.46	13.9	12.94	13.45	13.705	17.475	14.395	15.34	14.2055	1.43597
Treatment	15.07	19.885	16.535	16.2	15.71	17.54	15.145	16.07	17.245	18.385	16.7785	1.51487

## Sheet: Plant height (cm)
Plant height (cm)											Average	SD
Blank	20.3	25.3	19.35	18.05	17.8	23.3	18.05	20.2	16.7	18.45	19.75	2.68007
Control	15.15	13.55	14.75	14.65	15.8	15	16.6	15.5	16.1	15.7	15.28	0.861265
Treatment	25.9	22.5	18.4	20.95	24.15	24.55	18.9	26.25	22.05	19.6	22.325	2.84851

## Sheet: Fresh weight (g)
Fresh weight (g)											Average	SD
Blank	87.36	78.53	95.98	95.49	93.26	94.53	90.2	88.88	88.63	86.16	89.902	5.30618
Control	59.8	58.31	82.91	62.2	62.84	79.03	57.15	56.68	61.38	67.26	64.756	9.13097
Treatment	107.41	101.67	111.24	104.78	110.11	106.34	107.42	116.37	92.6	102.4	106.034	6.40098

## Sheet: Leaf thickness (mm)
Leaf thickness (mm)																									Average	SD
Blank	1.17	1.01	1.05	1.03	0.94	0.98	0.9	0.95	1.01	1.11	1.05	0.91	1.07	0.93	0.99	0.92	1.08	0.97	0.92	0.87	0.91	0.82	1	0.94	0.980417	0.0816929
Control	1.15	1.21	1.15	1.1	1.1	1.15	1.12	1.08	1.04	1.03	1	1.08	1.13	1.21	1.12	1.11	1.24	1.05	0.99	0.91	1.04	1.07	1.13	1	1.09208	0.0771773
Treatment	1.43	1.37	1.21	1.27	1.07	1.13	1.1	1.13	1.14	1.17	1.22	1.03	1.05	1.1	1.3	1.14	1.22	1.24	1.06	1.03	1.24	1.3	1.14	1.12	1.17542	0.106525

## Sheet: Leaf area(cm2）
Leaf area (cm2）	Blank			Control			Treatment
	Length（cm)	Width（cm)	Leaf area (cm2）	Length（cm)	Width（cm)	Leaf area (cm2）	Length（cm)	Width（cm)	Leaf area (cm2）
	25	9.8	183.75	15.7	6	70.65	30.2	11.2	253.68
	20.3	7.8	118.755	21.8	7.6	124.26	34.9	15.5	405.712
	22.8	7.8	133.38	17.2	6	77.4	26	8.9	173.55
	26.5	9.4	186.825	17.7	5.9	78.3225	31.2	12.5	292.5
	22	7.2	118.8	18.2	6.1	83.265	30	10.5	236.25
	21.5	7.4	119.325	20.5	7.4	113.775	31	11.2	260.4
	22.8	7.7	131.67	21.2	6.2	98.58	29.8	11.6	259.26
	22.3	8.3	138.818	18.6	6.8	94.86	33.6	15.1	380.52
	23.1	9.5	164.588	22.3	6.8	113.73	29.8	11	245.85
	24.9	9.2	171.81	17.8	5.9	78.765	29.5	14.9	329.663
	20.2	9.2	139.38	20.5	7.2	110.7	22.3	8.2	137.145
	23.8	9.4	167.79	15.4	5.8	66.99	33.9	12.4	315.27
	19.5	8.9	130.163	17.5	6.2	81.375	30.5	12.7	290.512
	18.8	8.5	119.85	15.8	6.2	73.47	24.6	8.9	164.205
	17.5	7.3	95.8125	15.2	6.7	76.38	21.2	7.8	124.02
	18.6	7.9	110.205	15.5	5.6	65.1	21.3	8	127.8
	19.6	7.9	116.13	17.8	5.7	76.095	20.7	9.1	141.277
	21.4	9.6	154.08	14.6	5.8	63.51	29.6	11	244.2
	20.8	7.5	117	15.9	5.3	63.2025	27.8	11.2	233.52
	21.2	9.8	155.82	14.2	4.9	52.185	28.3	11.4	241.965
Average			138.698			83.1308			242.865
SD			25.9504			19.803			80.6771
